# Supplementary material for: Circulating tumor DNA dynamics using patient-customized assays are associated with outcome in neoadjuvantly treated breast cancer
Source: PubMed Central journal article supplement (PMC6549569; doi:10.1101/mcs.a003772), 2019-04

A.

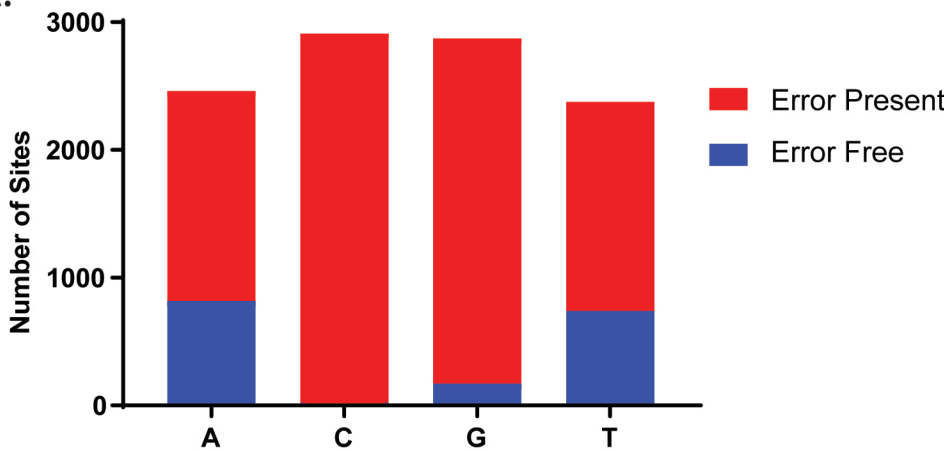

B.

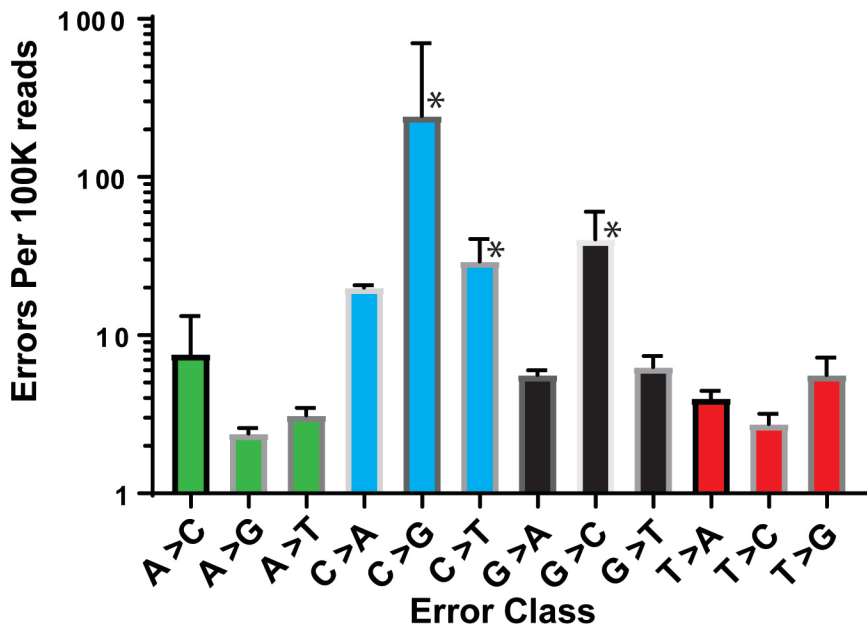

Supplement: supp_mcs.a003772_Supplemental_FigS1.pdf [file supp_mcs.a003772_Supplemental_FigS1.pdf]
